# Supplementary material for: Notch3 Interactome Analysis Identified WWP2 as a Negative Regulator of Notch3 Signaling in Ovarian Cancer
Source: PubMed Central journal article supplement (PMC4214668; doi:10.1371/journal.pgen.1004751), 2014-10-30
Supplement: pgen.1004751.s001.pdf [file pgen.1004751.s001.pdf]

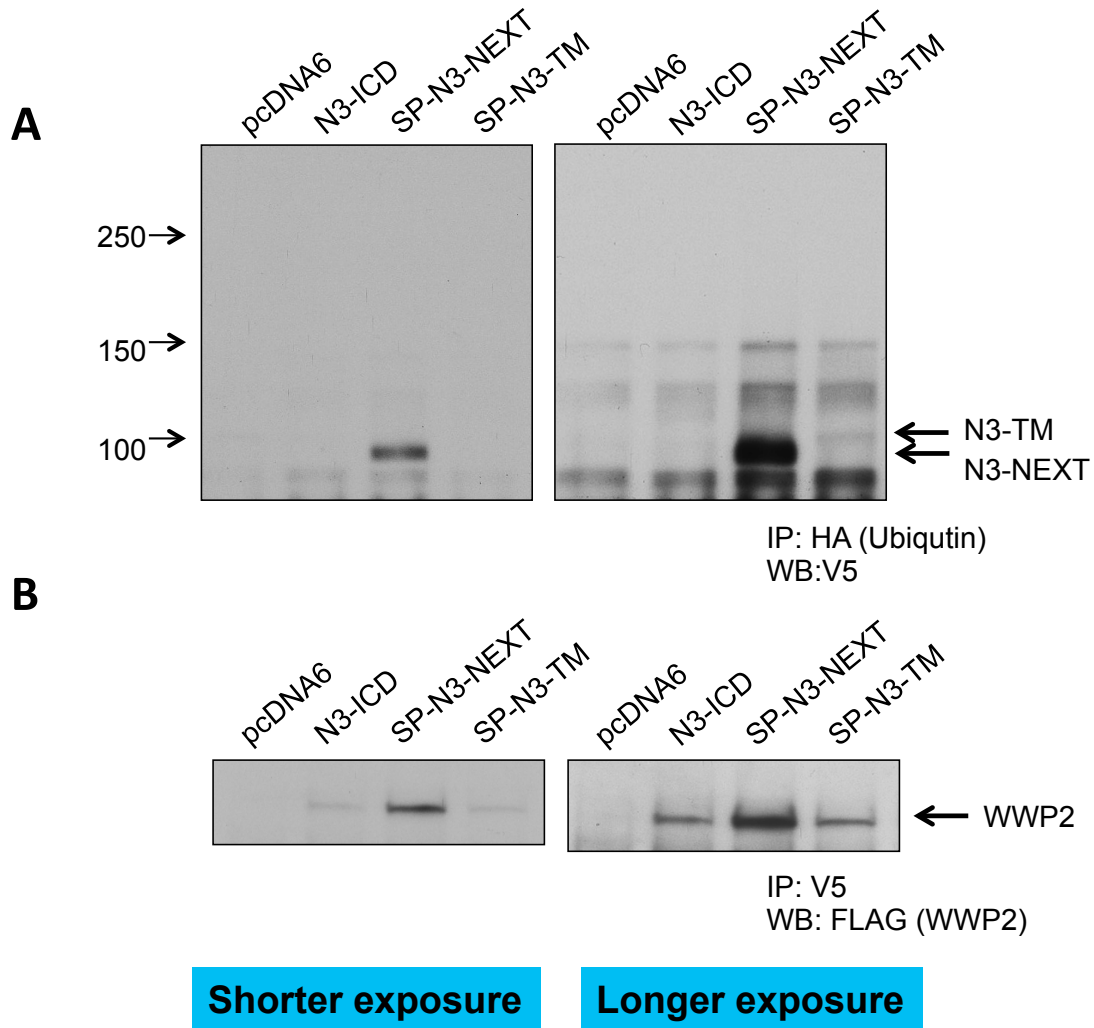

**Fig. S1. Co-immunoprecipitation performed to detect ubiquitination of N3 fragments (A) and interaction between WWP2 and N3 fragments (B).**
