# Supplementary material for: Notch3 Interactome Analysis Identified WWP2 as a Negative Regulator of Notch3 Signaling in Ovarian Cancer
Source: PubMed Central journal article supplement (PMC4214668; doi:10.1371/journal.pgen.1004751), 2014-10-30
Supplement: pgen.1004751.s002.pdf [file pgen.1004751.s002.pdf]

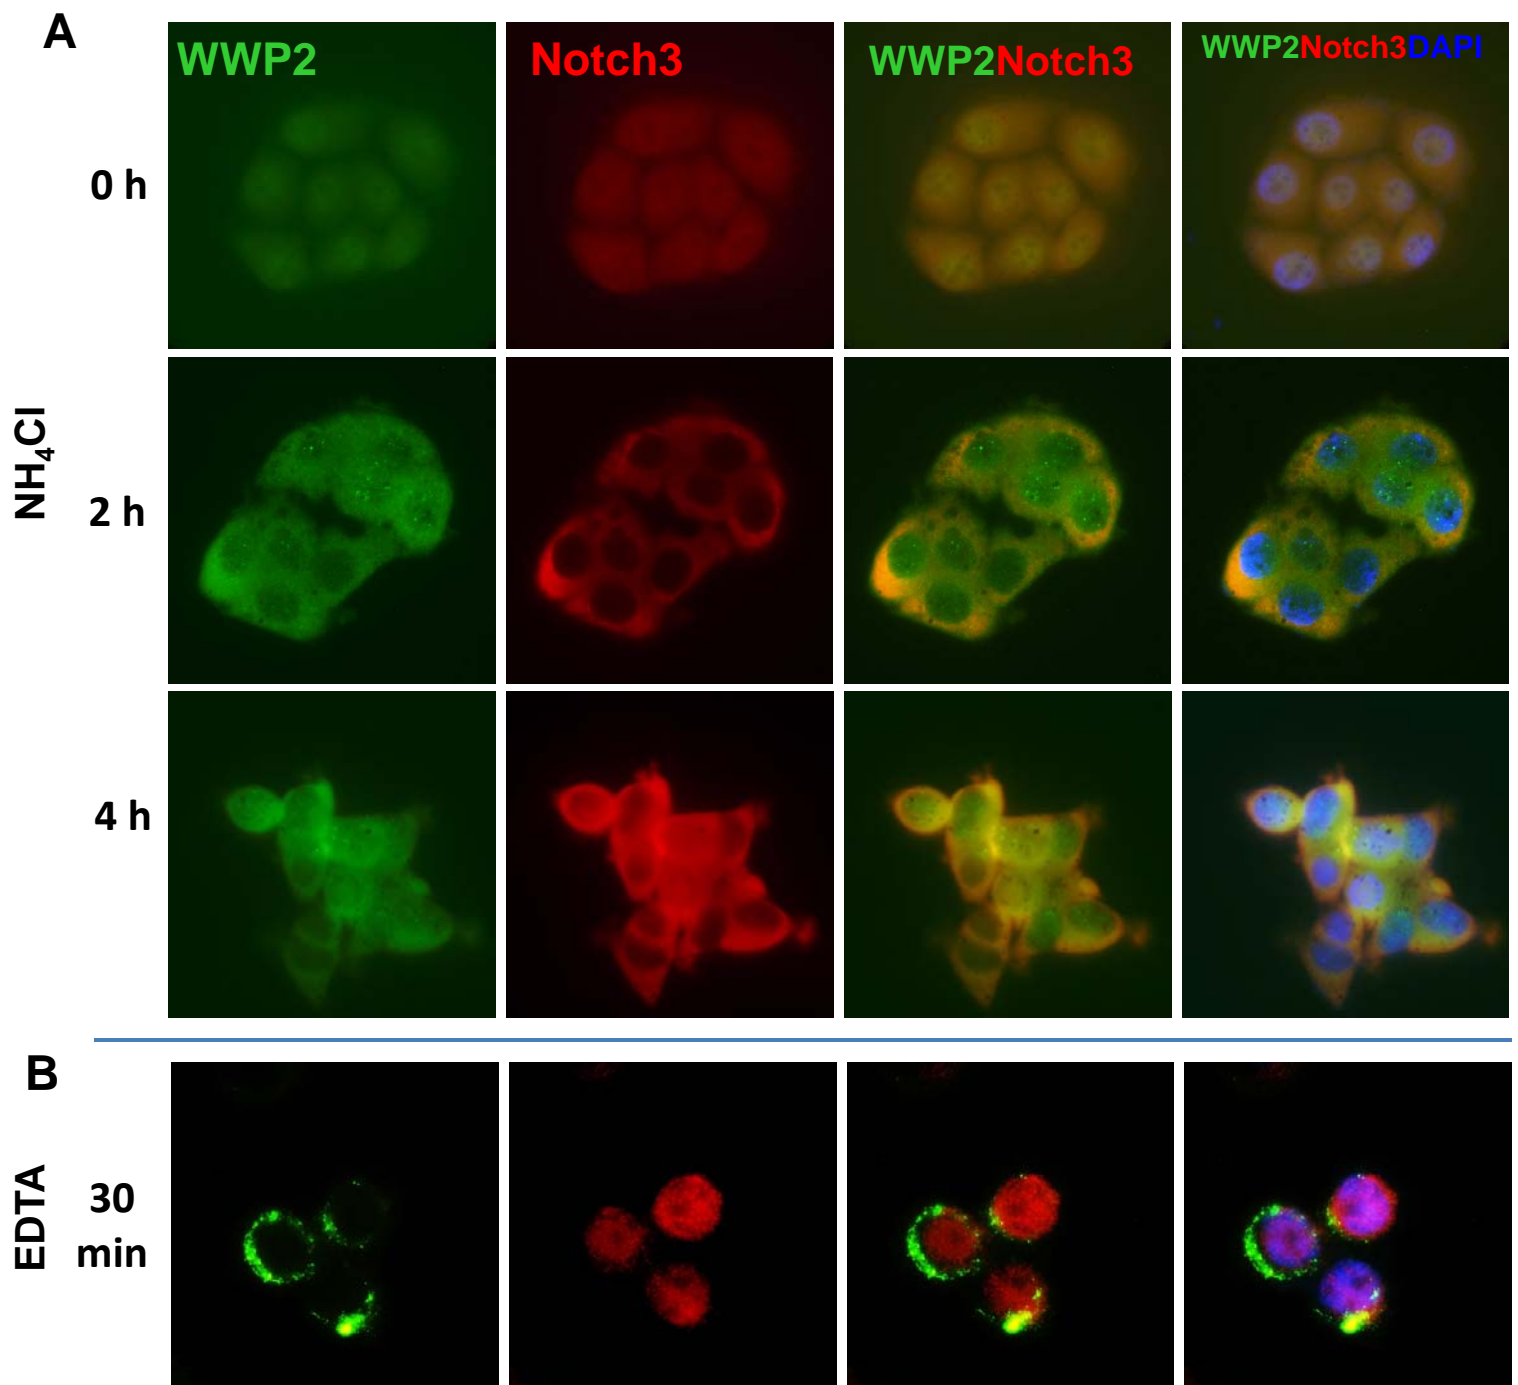

**Fig. S2. Localization of WWP2 and Notch3 in cancer cells treated with  $\text{NH}_4\text{Cl}$ .** MCF7 cells were treated with either  $\text{NH}_4\text{Cl}$  (A) or EDTA (B) for the indicated time and cells were subjected to immunofluorescence staining. In  $\text{NH}_4\text{Cl}$  treated cells, WWP2 and Notch3 protein fragments are co-localized. However, in EDTA treated cells, WWP2 and N3-ICD are located in different cellular compartments. As shown in Fig. 4,  $\text{NH}_4\text{Cl}$  treatment resulted in release and cytoplasmic accumulation of N3-NEXT while EDTA treatment induces release and nuclear accumulation of N3-ICD.
