# Supplementary material for: Notch3 Interactome Analysis Identified WWP2 as a Negative Regulator of Notch3 Signaling in Ovarian Cancer
Source: PubMed Central journal article supplement (PMC4214668; doi:10.1371/journal.pgen.1004751), 2014-10-30
Supplement: pgen.1004751.s003.pdf [file pgen.1004751.s003.pdf]

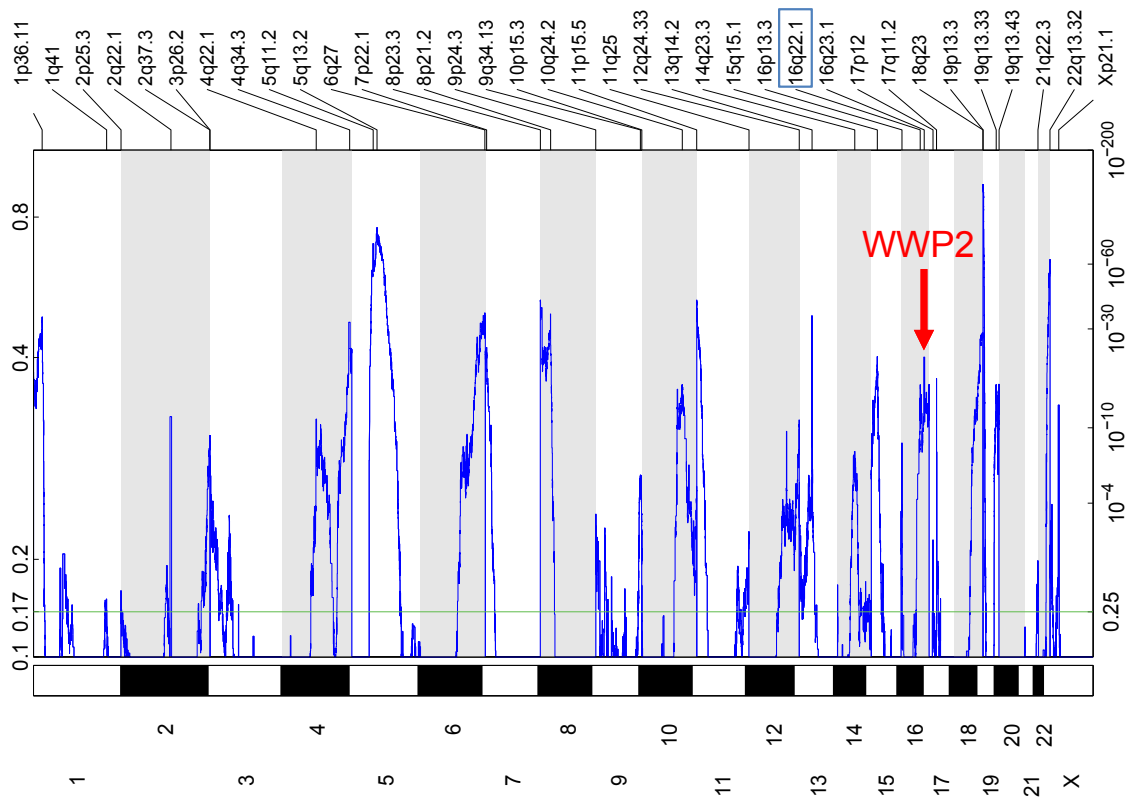

**Fig. S3. GISTIC analysis of ovarian HGSC in TCGA dataset demonstrated significantly deleted sub-chromosomal regions.** Vertical axis: GISTIC score (left) and q-value (right).
