# Supplementary material for: Notch3 Interactome Analysis Identified WWP2 as a Negative Regulator of Notch3 Signaling in Ovarian Cancer
Source: PubMed Central journal article supplement (PMC4214668; doi:10.1371/journal.pgen.1004751), 2014-10-30
Supplement: pgen.1004751.s004.pdf [file pgen.1004751.s004.pdf]

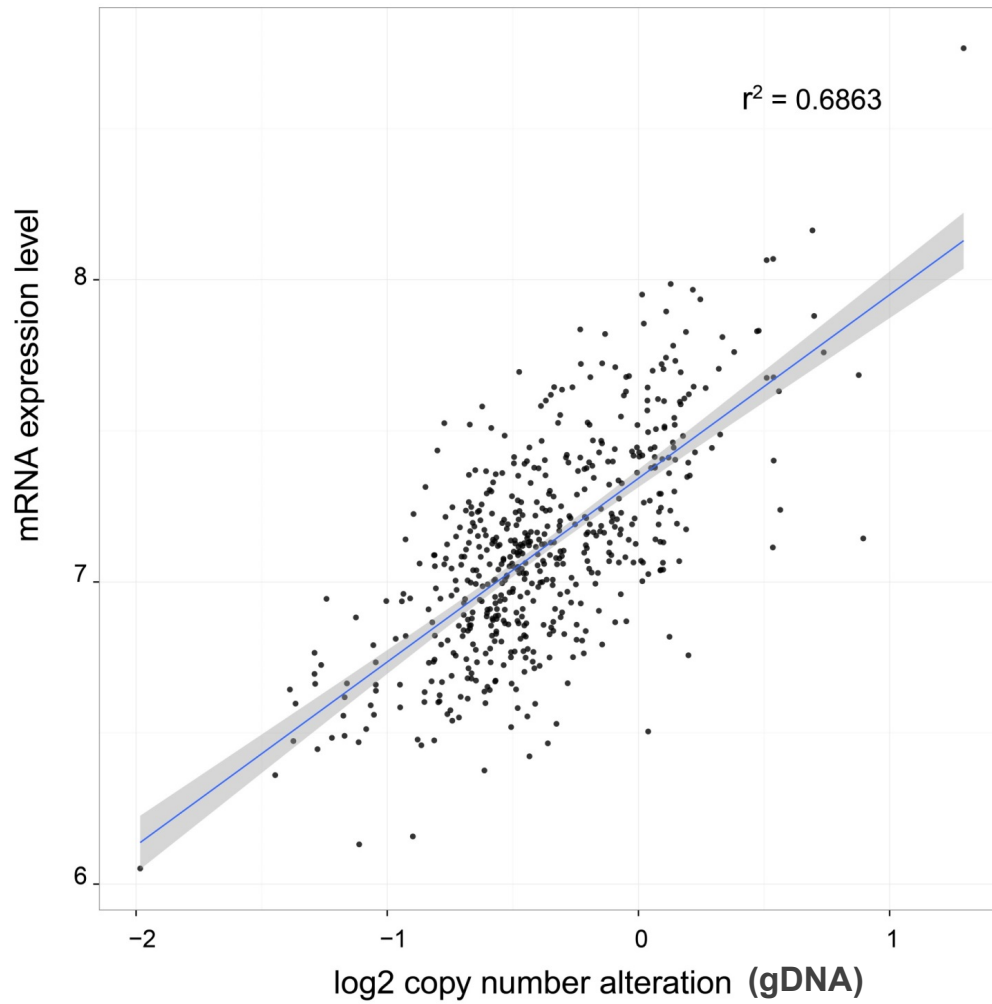

**Fig. S4. Relationship between the WWP2 gDNA copy number alteration and the transcript expression level using ovarian HGSC dataset in the TCGA.**
