# Supplementary material for: Notch3 Interactome Analysis Identified WWP2 as a Negative Regulator of Notch3 Signaling in Ovarian Cancer
Source: PubMed Central journal article supplement (PMC4214668; doi:10.1371/journal.pgen.1004751), 2014-10-30
Supplement: pgen.1004751.s005.pdf [file pgen.1004751.s005.pdf]

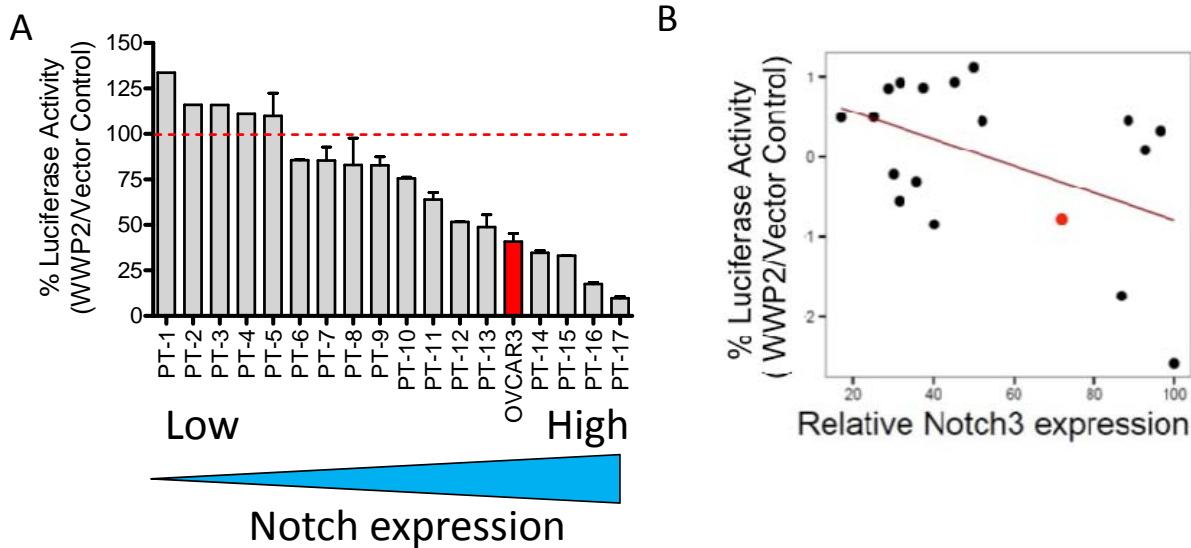

**Fig. S5. Ectopic WWP2 expression reduces Notch signaling in primary cultures of ovarian cancer cells with high levels of Notch3 expression.**

(A) Primary cultures of ovarian cancer cells were transfected with a Notch luciferase reporter and were co-transfected with the WWP2 cDNA expression construct or control plasmid. The data are normalized to the same cell group transfected with a control plasmid. Reporter activities are reduced in the cell cultures with higher levels of Notch3 expression. The data obtained from OVCAR3 was included as a reference. (B) Correlations between Notch signaling activity upon WWP2 transfection and Notch protein expression in 17 primary cultures of ovarian cancer samples. Red dot represents data obtained from OVCAR3.  $R = -0.46$ ,  $p < 0.05$  (one-tailed Pearson test).
