# Supplementary material for: Notch3 Interactome Analysis Identified WWP2 as a Negative Regulator of Notch3 Signaling in Ovarian Cancer
Source: PubMed Central journal article supplement (PMC4214668; doi:10.1371/journal.pgen.1004751), 2014-10-30
Supplement: pgen.1004751.s007.pdf [file pgen.1004751.s007.pdf]

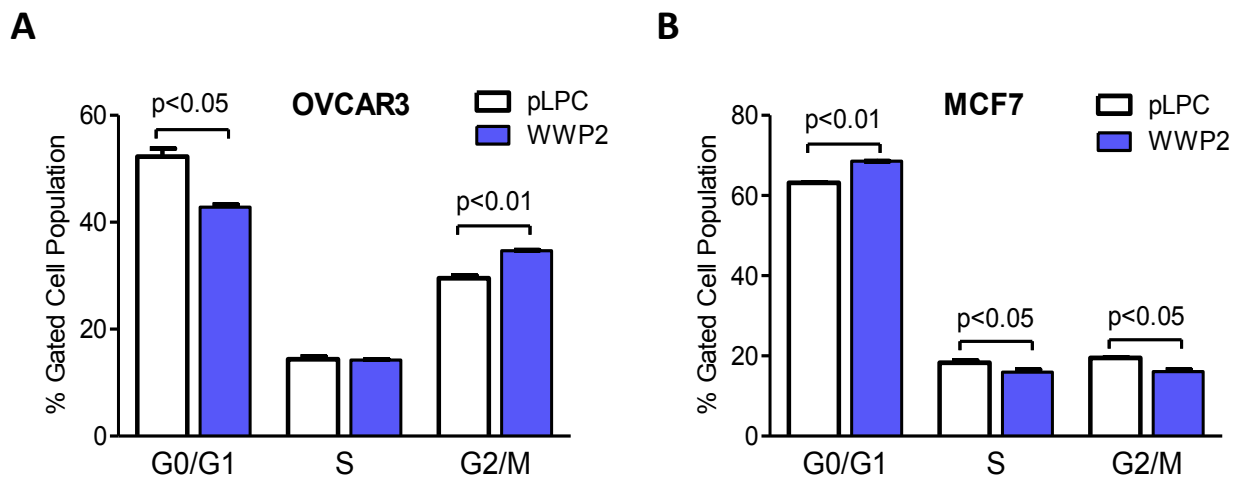

**Fig. S7. WWP2 overexpression leads to cell cycle arrest in OVCAR3 and MCF7 cells.** OVCAR3 and MCF7 cells were transfected with WWP2 expressing plasmid and control vector (pLPC) and cell cycle analysis was performed two days after transfection. Ectopic WWP2 expression leads to G2/M arrest in OVCAR3 (A) and G0/G1 arrest in MCF7 (B).
