# Supplementary material for: Notch3 Interactome Analysis Identified WWP2 as a Negative Regulator of Notch3 Signaling in Ovarian Cancer
Source: PubMed Central journal article supplement (PMC4214668; doi:10.1371/journal.pgen.1004751), 2014-10-30
Supplement: pgen.1004751.s009.pdf [file pgen.1004751.s009.pdf]

**Table S1. Notch3 Protein Interactome**

| <b>Name</b> | <b>ID</b> | <b>Intensity Score</b> |
|-------------|-----------|------------------------|
| SORBS3      | IOH12305  | 61.6                   |
| WWP2        | IOH4735   | 57.1                   |
| WWP2        | IOH4735   | 47.6                   |
| SORBS3      | IOH12305  | 46.4                   |
| RBPJ        | IOH52060  | 35.1                   |
| RBPJ        | IOH52060  | 32.2                   |
| TNNT2       | IOH5297   | 24.6                   |
| TNNT2       | IOH5297   | 24.4                   |
| XKR8        | IOH4960   | 20.1                   |
| SNX19       | IOH27386  | 19.6                   |
| CNTD1       | IOH22486  | 19.4                   |
| XKR8        | IOH4960   | 19.2                   |
| CNTD1       | IOH22486  | 19.1                   |
| WDR25       | IOH5172   | 18.6                   |
| SCGB3A1     | IOH22643  | 18.4                   |
| CPNE6       | IOH55460  | 17.6                   |
| CPNE6       | IOH55460  | 16.3                   |
| WDR25       | IOH5172   | 16.1                   |
| SLC39A1     | IOH5139   | 15.8                   |
| BAG2        | IOH40925  | 15.7                   |
| SCGB3A1     | IOH22643  | 15.0                   |
| SLC39A1     | IOH5139   | 14.9                   |
| PPIA        | IOH59992  | 13.5                   |
| PPIA        | IOH59992  | 13.5                   |
| GGT6        | IOH40740  | 13.3                   |
| C8orf76     | IOH40091  | 13.3                   |
| C1QL1       | IOH6218   | 12.7                   |
| C1QL1       | IOH6218   | 12.7                   |
| TMEM108     | IOH4185   | 12.6                   |
| TMEM108     | IOH4185   | 11.6                   |
| C16orf75    | IOH23171  | 11.5                   |
| CRIP2       | IOH3437   | 11.0                   |
| NEDD9       | IOH27637  | 10.8                   |
| C16orf75    | IOH23171  | 10.8                   |
| TPT1        | IOH29340  | 10.5                   |
| CRIP2       | IOH3437   | 10.2                   |
| SNX19       | IOH27386  | 9.3                    |
| BTF3L4      | IOH14732  | 9.0                    |
| RET         | IOH5435   | 8.6                    |

|         |          |     |
|---------|----------|-----|
| MPPED2  | IOH22675 | 8.5 |
| NEDD9   | IOH27637 | 8.4 |
| C8orf76 | IOH40091 | 8.4 |
| BAG2    | IOH40925 | 8.4 |
| CBFA2T2 | IOH25743 | 8.3 |
| BTF3L4  | IOH14732 | 8.3 |
| TPT1    | IOH29340 | 8.3 |
| MYC     | IOH2954  | 8.2 |
| MPPED2  | IOH22675 | 8.2 |
| GGT6    | IOH40740 | 8.1 |
| CBFA2T2 | IOH25743 | 8.1 |
| SPTLC2  | IOH5616  | 7.5 |
| RET     | IOH5435  | 7.5 |
| SPTLC2  | IOH5616  | 7.4 |
| MYC     | IOH2954  | 7.0 |
