# Supplementary material for: Notch3 Interactome Analysis Identified WWP2 as a Negative Regulator of Notch3 Signaling in Ovarian Cancer
Source: PubMed Central journal article supplement (PMC4214668; doi:10.1371/journal.pgen.1004751), 2014-10-30
Supplement: pgen.1004751.s010.pdf [file pgen.1004751.s010.pdf]

| <b>Table S2. Notch3 Interactome Networks</b> |                 |                                                                         |                                                                                                                                                                                                                                                           |
|----------------------------------------------|-----------------|-------------------------------------------------------------------------|-----------------------------------------------------------------------------------------------------------------------------------------------------------------------------------------------------------------------------------------------------------|
| Score                                        | Focus Molecules | Top Functions                                                           | Molecules in the Network                                                                                                                                                                                                                                  |
| 38                                           | 15              | Gene Expression, Cell Cycle, Hair and Skin Development and Function     | ANXA7,betaestradiol,BTF3L4,C1QL1,C8orf76,CAPN15,CBFA2T2,CCND1,CNTD1,CPNE6,ERBB2,FOS,GGT6,GTF2H2D,KIAA0922,LOC391322,MPPED2,PRSS22,P<br>SME3,RMI2,SLC13A3,SLC39A1,SNX19,SS18L2,TAPT1,TGFB1,TLDC1,TMEM108,TMEM150C,TMEM184B,T<br>NNT2,UBC,WDR25,WWP2,ZNF75D |
| 26                                           | 11              | Cell Signaling, Cellular Development, Cellular Growth and Proliferation | Myc,CD3,CLEC4A,CRIP2,DOK5,ERK,ERK1/2,Fgf18,Im<br>munoglobulin,LRRN1,Max-Myc,MYC,NEDD9,NFkB<br>(complex),P38<br>MAPK,PPIA,RBPJ,RET,RFNG,SCGB3A1,Sh2b3,SORB<br>S3,Sos,SPTLC2,STYX,TAS1R1,Tgf                                                                |
